# Supplementary material
Source: Springer Nature journal article supplement (https://www.springermedizin.de/resource/supplementary/12876_2014_1189_MOESM1_ESM.pdf/9438302)

**A**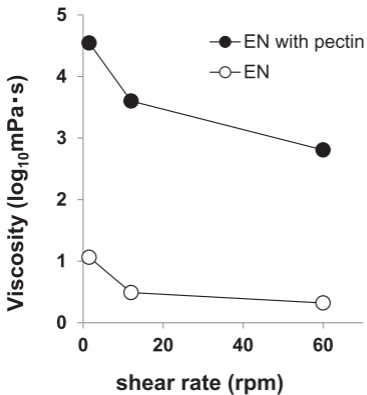**B**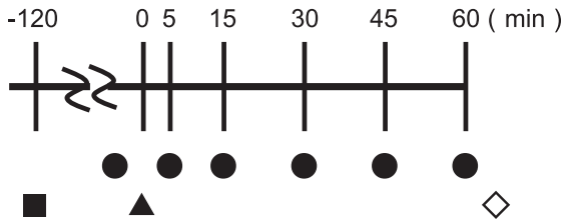

Supplement: MOESM1 [file 9438302]
